# Supplementary material for: Exploring Bayesian network model with noise filtering for rainfall-induced landslide susceptibility assessment in Fujian, China
Source: Frontiers journal article supplement (doi:10.3389/feart.2024.1444882), 2024-08-29
Supplement: Table_1.docx [file Table_1.docx]

Supplementary Material

# Supplementary Figures and Tables

**TABLE 1** Full name of each city and the counties

| **Abbreviation** | | **Full name** | **Abbreviation** | | **Full name** |
| --- | --- | --- | --- | --- | --- |
| **FZ**  Fuzhou | GL | Gulou | **QZ**  Quanzhou | AX | Anxi |
| CS | Cangshan | DH | Dehua |
| YT | Yongtai | FZ | Fengze |
| TJ | Taijiang | HA | Huian |
| MQ | Minqing | JM | Jinmen |
| MH | Minhou | JJ | Jinjiang |
| MW | Mawei | LC | Lichen |
| LY | Luoyuan | LJ | Luojiang |
| LJ | Lianjiang | NA | Nanan |
| FQ | Fuqing | QG | Quangang |
| **XM**  Xiamen | HC | Haicang | SS | Shishi |
| HL | Huli | YC | Yongchun |
| JM | Jimei | **ZZ**  Zhangzhou | DS | Dongshan |
| SM | Siming | HA | Huaan |
| TA | Tongan | LH | Longhai |
| XA | Xiangan | LW | Longwen |
| **PT**  Putian | CX | Chengxiang | NJ | Nanjing |
| HJ | Hanjiang | PH | Pinghe |
| XYU | Xiuyu | XC | Xiangcheng |
| XYO | Xianyou | YX | Yunxiao |
| **SM**  Sanming | DT | Datian | ZP | Zhangpu |
| JN | Jianning | CT | Changtai |
| JL | Jiangle | ZA | Zhaoan |
| MX | Mingxi | YD | Yongding |
| NH | Ninghua | **LY**  Longyan | CT | Changting |
| QL | Qingliu | ZP | Zhangping |
| SY | Sanyuan | XL | Xinluo |
| SX | Shaxian | WP | Wuping |
| TN | Taining | SH | Shanghang |
| YA | Yongan | LC | Liancheng |
| YX | Youxi | GZ | Guangze |
| **ND**  Ningde | FA | Fuan | **NP**  Nanping | JO | Jianou |
| FD | Fuding | JY | Jiangyang |
| GT | Gutian | PC | Puchen |
| JC | Jiaochen | SW | Shaowu |
| PN | Pingnan | SH | Shanghang |
|  | SN | Shouning |  | SX | Shaxian |
| XP | Xiapu | WYS | Wuyishan |
| TR | Tuorong | YP | Yanping |
| ZN | Zhouning | ZH | Zhenghe |

Table 1 shows the correspondence between abbreviations and full names of various districts and counties in Fujian Province. We supplemented Table 1 for better analysis and understand of Figure 13 in the manuscript. Due to it is not primary importance to the text and it is too large to fit the article, we decided to submit it as a supplement material.
